# Supplementary material
Source: MDPI journal article supplement (https://www.mdpi.com/2071-1050/11/6/1816)

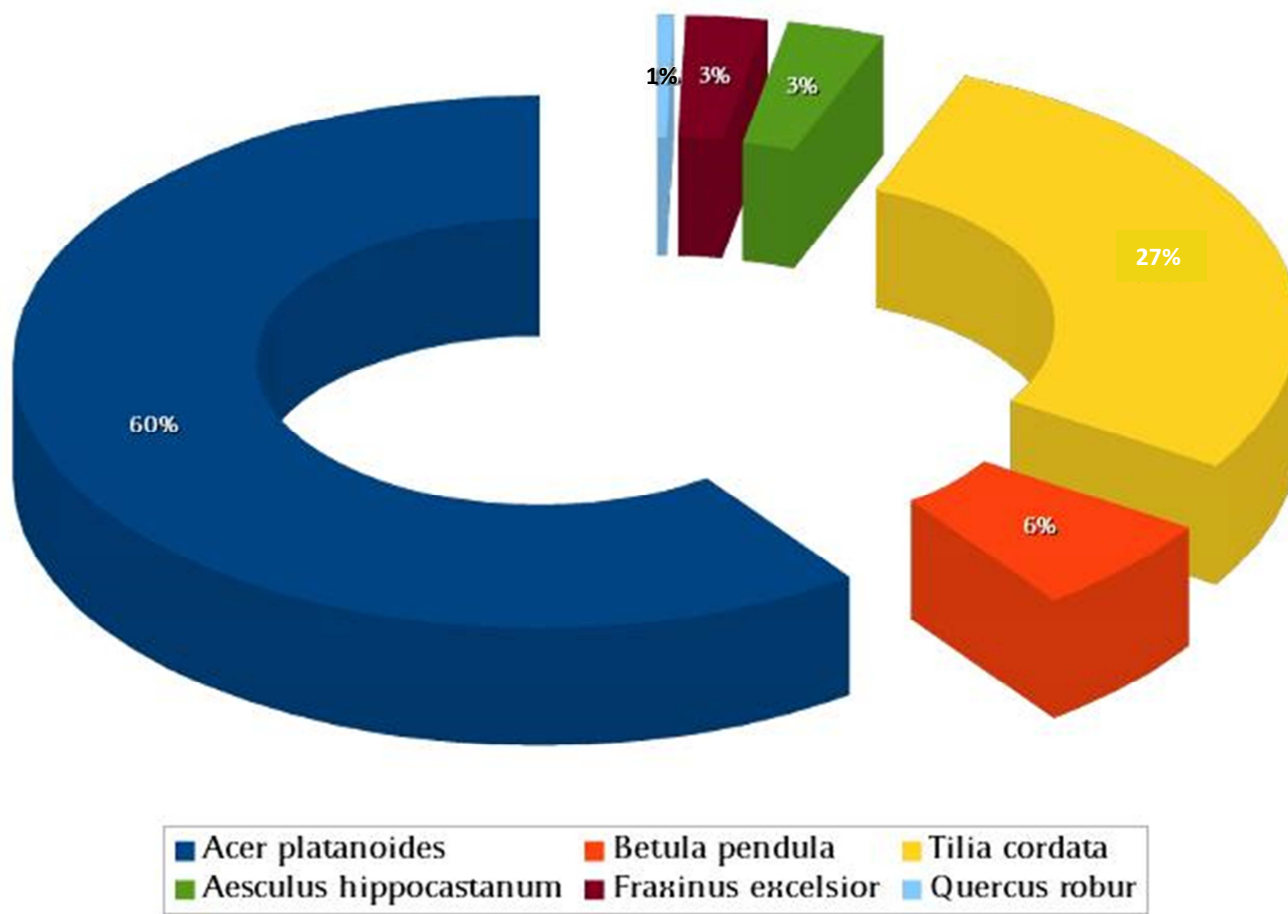

Fig. S1 Main species of trees in the alley

Supplement: s1 [file s1]
